# Supplementary material for: Splicing Factor DDX23, Transcriptionally Activated by E2F1, Promotes Ovarian Cancer Progression by Regulating FOXM1
Source: PubMed Central journal article supplement (PMC8710544; doi:10.3389/fonc.2021.749144), 2021-12-13
Supplement: DataSheet_1.pdf [file DataSheet_1.pdf]

## Supplementary Material

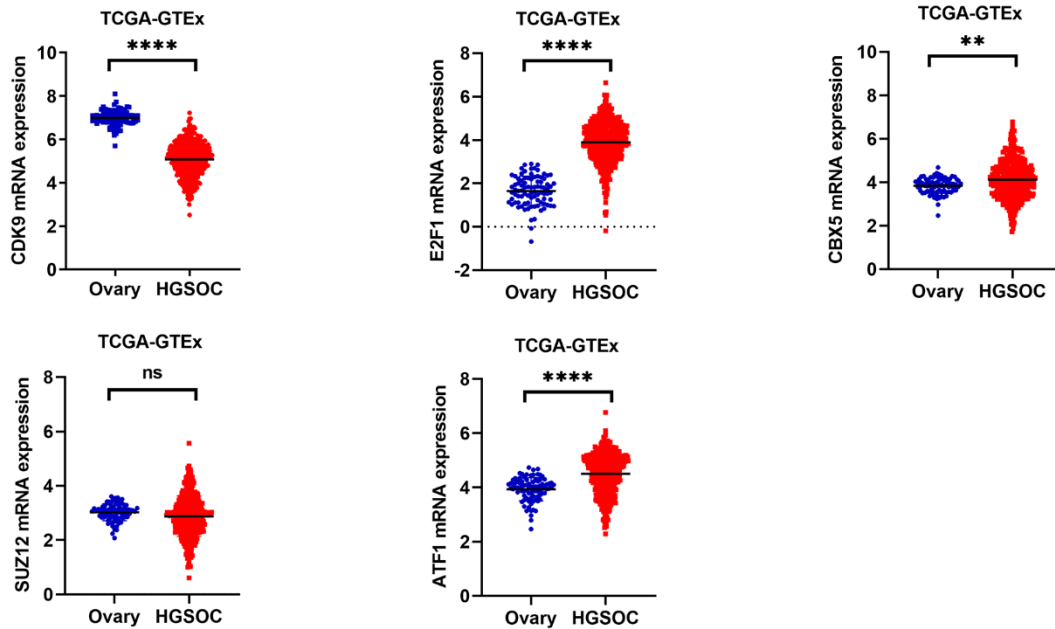

**Supplementary Figure S1** | Relative mRNA expression of CDK9, E2F1, CBX5, SUZ12, and ATF1 in HGSOC and normal ovarian tissues using data from TCGA-GTEX. ns, no significant,  $**P < 0.01$ ,  $****P < 0.0001$ .

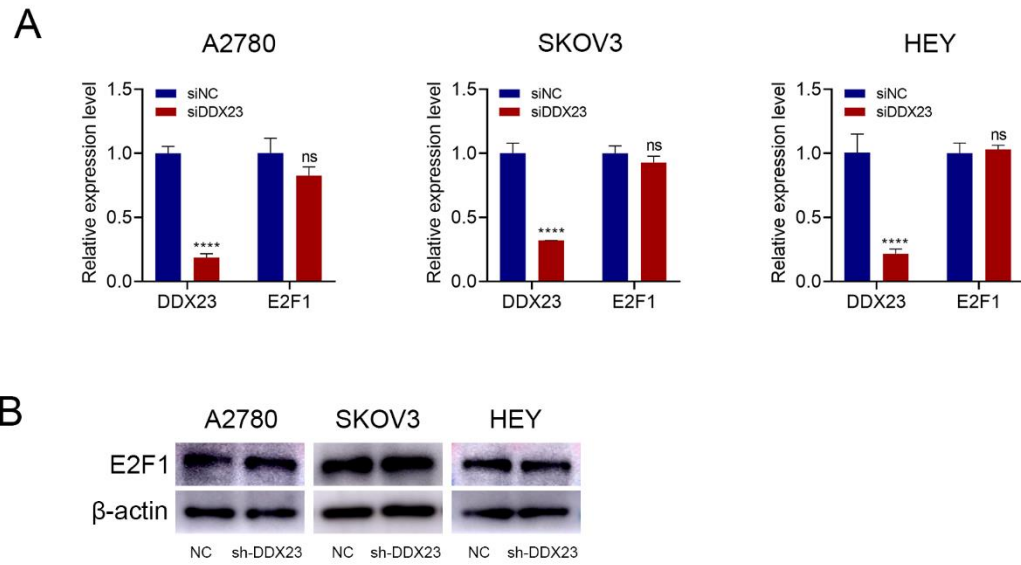

**Supplementary Figure S2 | (A,B)** The mRNA and protein levels of E2F1 in ovarian cancer cells with or without DDX23 knockdown were measured by qRT-PCR (A) and Western blotting (B). ns, no significant, \*\*\*\* $P < 0.0001$ .
